# Supplementary material
Source: publisher figshare collection journal article supplement (https://geolsoc.figshare.com/ndownloader/files/26750743)
Supplement: Supplementary file 1 [file 26750743]

## Sheet: Sheet1
Chapter 5.2a - Smellie & Martin - Erebus Volcanic Province - Volcanology
SUPPLEMENTARY INFORMATION - Summary of published isotopic ages for volcanic rocks in the Erebus Volcanic Province;
	the locations of dated samples, where known, are shown in multiple figures in this chapter
					error
Sample	Locality	Dated lithologies*	Age**	error	s.d.	Method	Reference	Notes
Ross Island Volcanic Field
Mt Bird
15970	Summit, Mt Bird, Ross Island	Trachyte	4.5	0.6	1 σ	K-Ar	Armstrong, 1978
22932	Cape Bird	Olivine augite plagioclase basalt, 'Melania Basalt Fmn'	3.7	0.2	1 σ	K-Ar	Armstrong, 1978
22934	Cape Bird	Hornblende trachyte, 'Trachyte Hill Fmn'	3	0.15	1 σ	K-Ar	Armstrong, 1978
22935	Cape Bird	Pyroxene hornblende trachyte, 'Aurora Trachyte Fmn'	3.15	0.09	1 σ	K-Ar	Armstrong, 1978
Mt Terror
22934	Cape Crozier	Hornblende trachyte, 'Aurora Trachyte Fmn'	1.31	0.04	1 σ	K-Ar	Armstrong, 1978
22955	Cape Crozier	Pyroxene trachyte, 'Aurora Trachyte Fmn'	1.29	0.05	1 σ	K-Ar	Armstrong, 1978
22976	Cape Crozier	Olivine basalt, 'Melania Basalt Fmn'	0.8	0.14	1 σ	K-Ar	Armstrong, 1978
14970	Summit, Mt Terra Nova	Pyroxene trachyte	0.8	0.5	1 σ	K-Ar	Armstrong, 1978
mc15	Post Office Hill, Cape Crozier	trachyte	1.33	0.02	2 σ	Ar-Ar	Tauxe et al., 2004
mc164	Cape Crozier	n.r.	1.36	0.01	2 σ	Ar-Ar	Lawrence et al., 2009
mc165	Cape Crozier	n.r.	1.45	0.06	2 σ	Ar-Ar	Lawrence et al., 2009
mc168	Cape Crozier	n.r.	1.38	0.05	2 σ	Ar-Ar	Lawrence et al., 2009
Mt Erebus
3	Cape Royds	Youngest 'kenyte' lava	0.68	0.14	n.r.	K-Ar	Treves, 1967
22910	Cape Barne	Feldspar from 'kenyte' lava	0.94	0.05	1 σ	K-Ar	Armstrong, 1978
22909	'Middle cone', Cape Barne	Basalt	0.8	0.2	1 σ	K-Ar	Armstrong, 1978
E 10	Fang Ridge, oldest unit	Fine-grained plagioclase basalt	0.81	0.02	1 σ	K-Ar	Armstrong, 1978
E 11	Fang Ridge, youngest unit	Porphyritic plagioclase basalt	0.73	0.07	1 σ	K-Ar	Armstrong, 1978
13170	Summit, Mt Erebus	Anorthoclase crystals from trachyte	0.55	0.15	1 σ	K-Ar	Armstrong, 1978
13170	Summit, Mt Erebus	Trachyte glass	0.45	0.2	1 σ	K-Ar	Armstrong, 1978
E 5	Summit, Mt Erebus	Anorthoclase crystals	0.44	0.09	1 σ	K-Ar	Armstrong, 1978
E 15	2nd crater, summit, Mt Erebus	Glassy 'kenyte' lava	0.15	0.05	1 σ	K-Ar	Armstrong, 1978
E 15	2nd crater, summit, Mt Erebus	Anorthoclase crystals	0.2	0.07	1 σ	K-Ar	Armstrong, 1978
E80020	Three Sister's Cone	Anorthite phonolite	0.026	0.004	2 σ	Ar-Ar	Esser et al., 2004
E81001	Hooper's Shoulder Cone	Anorthite phonolite	0.036	0.008	2 σ	Ar-Ar	Esser et al., 2004
E81001	Hooper's Shoulder Cone	Anorthite phonolite	0.028	0.01	2 σ	Ar-Ar	Esser et al., 2004
E81001	Hooper's Shoulder Cone	Anorthite phonolite	0.032	0.01	2 σ	Ar-Ar	Esser et al., 2004
E81001	Hooper's Shoulder Cone	WEIGHTED MEAN AGE	0.33	0.006	2 σ	Ar-Ar	Esser et al., 2004
E83400	Cape Evans	anorthite tephriphonolite	0.037	0.014	2 σ	Ar-Ar	Esser et al., 2004
E83400	Cape Evans	anorthite tephriphonolite	0.042	0.008	2 σ	Ar-Ar	Esser et al., 2004
E83400	Cape Evans	anorthite tephriphonolite	0.032	0.012	2 σ	Ar-Ar	Esser et al., 2004
E83400	Cape Evans	anorthite tephriphonolite	0.053	0.022	2 σ	Ar-Ar	Esser et al., 2004
E83400	Cape Evans	WEIGHTED MEAN AGE	0.04	0.006	2 σ	Ar-Ar	Esser et al., 2004
E93020	William's Cliff	anorthite tephriphonolite	0.057	0.01	2 σ	Ar-Ar	Esser et al., 2004
E83448	Cape Royds	anorthite tephriphonolite	0.073	0.01	2 σ	Ar-Ar	Esser et al., 2004
E83433	Cape Barne	anorthite tephriphonolite	0.089	0.004	2 σ	Ar-Ar	Esser et al., 2004
E83433	Cape Barne	anorthite tephriphonolite	0.09	0.012	2 σ	Ar-Ar	Esser et al., 2004
E83433	Cape Barne	anorthite tephriphonolite	0.089	0.004	2 σ	Ar-Ar	Esser et al., 2004
E83433	Cape Barne	anorthite tephriphonolite	0.087	0.008	2 σ	Ar-Ar	Esser et al., 2004
E83433	Cape Barne	WEIGHTED MEAN AGE	0.089	0.002	2 σ	Ar-Ar	Esser et al., 2004
E93021	SE of Hooper's Shoulder	anorthite tephriphonolite	0.11	0.012	2 σ	Ar-Ar	Esser et al., 2004
E93011	NW of Hooper's Shoulder	anorthite tephriphonolite	0.121	0.014	2 σ	Ar-Ar	Esser et al., 2004
E82405	Bomb Peak	trachyte	0.157	0.006	2 σ	Ar-Ar	Esser et al., 2004
E83454	Aurora Cliffs	trachyte	0.166	0.01	2 σ	Ar-Ar	Esser et al., 2004
E93019	Between Williams Cliff and Turks Head	anorthite tephriphonolite	0.243	0.018	2 σ	Ar-Ar	Esser et al., 2004
AW82015	Turks Head	anorthite tephriphonolite	0.243	0.01	2 σ	Ar-Ar	Esser et al., 2004
E93024	South of Abbott Peak	plagioclase tephriphonolite	0.342	0.018	2 σ	Ar-Ar	Esser et al., 2004
E93023	NE of Abbott Peak	plagioclase tephriphonolite	0.364	0.024	2 σ	Ar-Ar	Esser et al., 2004
E77012	Tryggve Point	plagioclase tephriphonolite dyke	0.368	0.018	2 σ	Ar-Ar	Esser et al., 2004
AW82038	Turks Head	basanite	0.378	0.028	2 σ	Ar-Ar	Esser et al., 2004
E83453	SW of Abbott Peak	phonotephrite	0.43	0.4	2 σ	Ar-Ar	Esser et al., 2004
E93010	West of Abbott Peak	phonotephrite	0.508	0.02	2 σ	Ar-Ar	Esser et al., 2004
E93008	Crash Nunatak	phonotephrite	0.52	0.12	2 σ	Ar-Ar	Esser et al., 2004
E81002	Abbott Peak	plagioclase tephriphonolite	0.531	0.038	2 σ	Ar-Ar	Esser et al., 2004
E83407	Inaccessible Island, Dellbridge Islands (Mt Erebus)	phonolite	0.539	0.012	2 σ	Ar-Ar	Esser et al., 2004
E93005	Fang Ridge	plagioclase phonotephrite	0.718	0.66	2 σ	Ar-Ar	Esser et al., 2004
E93007	Fang Ridge	plagioclase phonotephrite	0.758	0.02	2 σ	Ar-Ar	Esser et al., 2004
E93012	Fang Ridge	tephrite	1.07	0.18	2 σ	Ar-Ar	Esser et al., 2004
E83432	Cape Barne	basanite dyke	1.31	0.016	2 σ	Ar-Ar	Esser et al., 2004
E93032	Cape Barne	basanite dyke	1.33	0.06	2 σ	Ar-Ar	Esser et al., 2004
E93032	Cape Barne	WEIGHTED MEAN AGE	1.311	0.016	2 σ	Ar-Ar	Esser et al., 2004
39	Mt Erebus summit, pre-caldera		0.095	0.009	2 σ	Ar-Ar	Harpel et al., 2004
33	Mt Erebus summit, pre-caldera		0.091	0.004	2 σ	Ar-Ar	Harpel et al., 2004
13	Mt Erebus summit, pre-caldera		0.086	0.015	2 σ	Ar-Ar	Harpel et al., 2004
17	Mt Erebus summit, pre-caldera		0.076	0.004	2 σ	Ar-Ar	Harpel et al., 2004
62(a)	Mt Erebus summit, pre-caldera		0.027	0.003	2 σ	Ar-Ar	Harpel et al., 2004
61	Mt Erebus summit, pre-caldera		0.021	0.004	2 σ	Ar-Ar	Harpel et al., 2004
66	Mt Erebus summit southwest		0.017	0.008	2 σ	Ar-Ar	Harpel et al., 2004
30(a)	Mt Erebus summit northeast		0.014	0.006	2 σ	Ar-Ar	Harpel et al., 2004
30(b)	Mt Erebus summit northeast		0.014	0.002	2 σ	Ar-Ar	Harpel et al., 2004
30(c)	Mt Erebus summit northeast		0.01	0.004	2 σ	Ar-Ar	Harpel et al., 2004
30(a-c)	Mt Erebus summit northeast	WEIGHTED MEAN AGE	0.013	0.002	2 σ	Ar-Ar	Harpel et al., 2004
85	Mt Erebus summit southeast		0.012	0.003	2 σ	Ar-Ar	Harpel et al., 2004
20(a)	Mt Erebus summit lower hut		0.01	0.006	2 σ	Ar-Ar	Harpel et al., 2004
20(b)	Mt Erebus summit lower hut		0.011	0.006	2 σ	Ar-Ar	Harpel et al., 2004
34	Mt Erebus summit lower hut		0.011	0.008	2 σ	Ar-Ar	Harpel et al., 2004
20 & 34	Mt Erebus summit lower hut	WEIGHTED MEAN AGE	0.011	0.004	2 σ	Ar-Ar	Harpel et al., 2004
35	Mt Erebus summit, Nausea Knob		0.01	0.005	2 σ	Ar-Ar	Harpel et al., 2004
4	Mt Erebus summit, Tramways		0.009	0.002	2 σ	Ar-Ar	Harpel et al., 2004
54	Mt Erebus summit, lower Ice Tower Ridge		0.009	0.007	2 σ	Ar-Ar	Harpel et al., 2004
83	Mt Erebus summit south		0.006	0.002	2 σ	Ar-Ar	Harpel et al., 2004
51	Mt Erebus summit, upper Ice Tower Ridge		0.004	0.003	2 σ	Ar-Ar	Harpel et al., 2004
40	Mt Erebus summit northwest		0.001	0.005	2 σ	Ar-Ar	Harpel et al., 2004
EBT-2	Mt Erebus summit	tephra	0.071	0.005	2 σ	Ar-Ar	Harpel et al., 2004
BIT-272	Mt Erebus summit	tephra	0.039	0.006	2 σ	Ar-Ar	Harpel et al., 2004
EBT-63	Mt Erebus summit	tephra	0.015	0.004	2 σ	Ar-Ar	Harpel et al., 2004
mc09	Cape Royds	'kenyte' lava	74 ka	15 ka	2 σ	Ar-Ar	Tauxe et al., 2004
mc13	Cape Evans	'kenyte' lava	55 ka	10 ka	2 σ	Ar-Ar	Tauxe et al., 2004
E87037	Mt Erebus summit	pre-caldera lava	0.081	0.003	2 σ	Ar-Ar	Kelly et al., 2008
E86031	Mt Erebus summit	pre-caldera lava	0.172	0.01	2 σ	Ar-Ar	Kelly et al., 2008
E86003	Mt Erebus summit	pre-caldera lava	0.023	0.012	2 σ	Ar-Ar	Kelly et al., 2008
E87040	Mt Erebus summit, 'Northwest'		-0.003	0.007	2 σ	Ar-Ar	Kelly et al., 2008
-	Bomb Peak	tephra	0.023	0.003	2 σ	Ar-Ar	Kelly et al., 2008
-	Mt Erebus, Ice Station	lava	0.159	0.002	2 σ	Ar-Ar	Kelly et al., 2008
E04-ND-01	Mt Erebus summit, Lower Ice Tower Ridge	lava	6.27 ka	0.56 ka	2 σ	cosmogenic	Kelly et al., 2008	age given assumes no surface erosion
E04-ND-03	Mt Erebus summit, Lower Hut	lava	5.02 ka	0.40 ka	2 σ	cosmogenic	Kelly et al., 2008	age given assumes no surface erosion
E04-ND-07	Mt Erebus summit, Northeast	lava	6.84 ka	0.68 ka	2 σ	cosmogenic	Kelly et al., 2008	age given assumes no surface erosion
EIT-008	Mt Erebus, NE slopes	englacial tephra	40 ka	20 ka	2 σ	Ar-Ar	Iverson et al., 2014
EIT-015	Mt Erebus, NE slopes	englacial tephra	1 (Ma)	-	-	Ar-Ar	Iverson et al., 2014	unreliable age
EIT-034-04	near Cape Barne	englacial tephra	31 ka	7 ka	2 σ	Ar-Ar	Iverson et al., 2014
E11-05, E11-13	Mt Erebus summit, 'Northwest'	lava	4.52/5.32 ka	0.08/0.09 ka	1 σ	cosmogenic	Parmelee et al., 2015	alternative ages given based on different models for scaling cosmogenic production rates
E11-09, E11-20, E11-24	Mt Erebus summit, 'Southwest'	lava	4.60/5.46 ka	0.11/0.13 ka	1 σ	cosmogenic	Parmelee et al., 2015	alternative ages given based on different models for scaling cosmogenic production rates
E11-06, E11-18, E11-19	Mt Erebus summit, 'Nausea Knob'	lava	5.30/6.33 ka	0.08/0.10 ka	1 σ	cosmogenic	Parmelee et al., 2015	alternative ages given based on different models for scaling cosmogenic production rates
E11-10, E11-16, E11-17	Mt Erebus summit, 'Lower Hut'	lava	5.36/6.31 ka	0.08/0.10 ka	1 σ	cosmogenic	Parmelee et al., 2015	alternative ages given based on different models for scaling cosmogenic production rates
E11-07, E11-14, E11-15	Mt Erebus summit, 'Tramways'	lava	5.55/6.52 ka	0.12/0.15 ka	1 σ	cosmogenic	Parmelee et al., 2015	alternative ages given based on different models for scaling cosmogenic production rates
E11-22, E11-25	Mt Erebus summit, 'Lower Ice Tower Ridge'	lava	6.67/7.94 ka	0.11/0.13 ka	1 σ	cosmogenic	Parmelee et al., 2015	alternative ages given based on different models for scaling cosmogenic production rates
E11-11, E11-29, E11-30	Mt Erebus summit, 'Southeast'	lava	6.85/8.16 ka	0.08/0.11 ka	1 σ	cosmogenic	Parmelee et al., 2015	alternative ages given based on different models for scaling cosmogenic production rates
E11-02, E11-26, E11-27	Mt Erebus summit, 'Northeast'	lava	7.01/8.28 ka	0.11/0.13 ka	1 σ	cosmogenic	Parmelee et al., 2015	alternative ages given based on different models for scaling cosmogenic production rates
E11-21, E11-23	Mt Erebus summit, 'Upper Ice Tower Ridge'	lava	7.47/8.96 ka	0.16/0.20 ka	1 σ	cosmogenic	Parmelee et al., 2015	alternative ages given based on different models for scaling cosmogenic production rates
E11-10, E11-28	Mt Erebus summit, 'South'	lava	8.50/10.34 ka	0.19/0.24 ka	1 σ	cosmogenic	Parmelee et al., 2015	alternative ages given based on different models for scaling cosmogenic production rates
E11-04	Mt Erebus summit; young pre-caldera	lava	18.64/22.19 ka	0.42/0.51 ka	1 σ	cosmogenic	Parmelee et al., 2015	alternative ages given based on different models for scaling cosmogenic production rates
E11-12	Mt Erebus summit, 'West'	lava	27.61/32.08 ka	0.63/0.73 ka	1 σ	cosmogenic	Parmelee et al., 2015	alternative ages given based on different models for scaling cosmogenic production rates
E11-31	Mt Erebus summit; old pre-caldera	lava	74.94/88.16 ka	1.71/2.01 ka	1 σ	cosmogenic	Parmelee et al., 2015	alternative ages given based on different models for scaling cosmogenic production rates
E11-31 (ol)	Mt Erebus summit; old pre-caldera	lava	71.52/84.15 ka	1.64/1.91 ka	1 σ	cosmogenic	Parmelee et al., 2015	alternative ages given based on different models for scaling cosmogenic production rates
Hut Point Peninsula
22878	Half Moon Crater	Hornblende basalt, 'Melania Basalt Fmn'	1	0.15	1 σ	K-Ar	Armstrong, 1978
22900	Hut Point Peninsula	Olivine basalt, 'Nubian Basalt Fmn'	0.57	0.03	1 σ	K-Ar	Armstrong, 1978
22892	Black Nob	Olivine basalt, 'Nubian Basalt Fmn'	0.43	0.07	1 σ	K-Ar	Armstrong, 1978
OH 51-1-63	Observation Hill	phonolite	1.22	0.04	1 σ	K-Ar	Forbes et al., 1974
OH 1-8-63	Observation Hill	phonolite	1.16	0.03	1 σ	K-Ar	Forbes et al., 1974
OH 1-12-63	Observation Hill	phonolite	1.17	0.03	1 σ	K-Ar	Forbes et al., 1974
all OH samples	Observation Hill	WEIGHTED MEAN AGE	1.18	0.03	1 σ	K-Ar	Forbes et al., 1974
K-42	Between Castle Rock & Arrival Heights	amphibole basalt	2.2	n.r.	n.r.	K-Ar	Polyakov et al., 1976
K-53	Knob Point	basalt	4.7	n.r.	n.r.	K-Ar	Polyakov et al., 1976
K-45B	Arrival Heights	olivine basalt	3.4	n.r.	n.r.	K-Ar	Polyakov et al., 1976
K-46A	Below Arrival Heights?	olivine basalt	0.4	n.r.	n.r.	K-Ar	Polyakov et al., 1976
K-66	Hut Point	plagiobasalt	0.8	n.r.	n.r.	K-Ar	Polyakov et al., 1976
K-76	NE of Castle Rock	amphibole basalt	0.5	n.r.	n.r.	K-Ar	Polyakov et al., 1976
K-57	Armitage Point	basalt	10	n.r.	n.r.	K-Ar	Polyakov et al., 1976
K-57B	Observation Hill	trachyte	1.3	n.r.	n.r.	K-Ar	Polyakov et al., 1976
K-57R	Observation Hill	n.r.	1.8	n.r.	n.r.	K-Ar	Polyakov et al., 1976
K-2	Ford Rock	kenyte (phonolite)	5	n.r.	n.r.	K-Ar	Polyakov et al., 1976
22879	Castle Rock	basanite dyke, base of outcrop	1.18	0.05	1 σ	K-Ar	Kyle, 1981a,c
1-148.81	DVDP 1 (drillcore)	basanite lava	1.34	0.23	1 σ	K-Ar	Kyle et al., 1979b; Kyle, 1981a
2-173.93	DVDP 2 (drillcore)	basanite lava clast in hyaloclastite	1.32	0.16	1 σ	K-Ar	Kyle et al., 1979b; Kyle, 1981a
1-25.32	DVDP 1 (drillcore)	hawaiite lava	1.21	0.11	1 σ	K-Ar	Kyle et al., 1979b; Kyle, 1981a
2-62.38	DVDP-2 (drillcore)	benmoreite lava clast in hyaloclastite	1.16	0.03	1 σ	K-Ar	Kyle et al., 1979b; Kyle, 1981a
mc01	Observation Hill	'trachyte'	1.18	0.01	2 σ	Ar-Ar	Tauxe et al., 2004
mc02	Crater Hill	basalt	0.33	0.02	2 σ	Ar-Ar	Tauxe et al., 2004
mc03	Crater Hill	basalt	0.348	0.008	2 σ	Ar-Ar	Tauxe et al., 2004
mc04	Fortress Rock	n.r.	0.34	0.006	2 σ	Ar-Ar	Tauxe et al., 2004
mc08	Breached Cone	basalt lava	0.65	0.05	2 σ	Ar-Ar	Tauxe et al., 2004
mc142	Hut Point Peninsula, Observation Hill	n.r.	1.23	0.02	2 σ	Ar-Ar	Lawrence et al., 2009
mc166	Hut Point Peninsula, base of Observation Hill	n.r.	1.33	0.12	2 σ	Ar-Ar	Lawrence et al., 2009
mc170	Hut Point Peninsula, east flank of Observation Hill	n.r.	1.03	0.1	2 σ	Ar-Ar	Lawrence et al., 2009
Mt Discovery Volcanic Field
Brown Peninsula
21001	Rainbow Ridge, Brown Peninsula	Hornblende trachyte, 'Trachyte Hill Fmn'	2.7	0.09	1 σ	K-Ar	Armstrong, 1978
21047	Brown Peninsula	Hornblende trachyte, 'Aurora Trachyte Fmn'	2.25	0.05	1 σ	K-Ar	Armstrong, 1978
21094	Brown Peninsula	Olivine augite basalt; 'Nubian Basalt Fmn'	2.2	0.09	1 σ	K-Ar	Armstrong, 1978
21068	Brown Peninsula	Hornblende basalt, 'Melania Basalt Fmn'	2.1	0.4	1 σ	K-Ar	Armstrong, 1978
Black Island
21230	Black Island	Alkali olivine basalt, 'Melania Basalt Fmn'	10.9	0.4	1 σ	K-Ar	Armstrong, 1978
21205	Black Island	Pyroxene trachyte, 'Aurora Trachyte Fmn'	3.8	0.09	1 σ	K-Ar	Armstrong, 1978
21208	Black Island	Alkali olivine basalt, 'Nubian Basalt Fmn'	3.35	0.14	1 σ	K-Ar	Armstrong, 1978
-	Black Island	Basalt underlying Scallop Hill Fmn	4.41 or 4.48	0.06	n.r.	K-Ar	Webb, quoted by Wright and Kyle, 1990e
OU70179	Black Island	phonolite	1.689	0.003	1 σ	Ar-Ar	Timms, 2006
OU70177	Black Island	phonolite	1.78	0.058	1 σ	Ar-Ar	Timms, 2006
mc130	Black Island	n.r.	7.25	0.07	2 σ	Ar-Ar	Lawrence et al., 2009
mc134	Black Island	n.r.	9.02	0.05	2 σ	Ar-Ar	Lawrence et al., 2009
White Island
VUW22989	c. 4.66 km N12˚W of Mt Heine, White Island	basalt	0.17	0.01	2 σ	K-Ar	Kyle, 1981a, cited by Cooper et al. (2007)
OU74799	White Island, NE of Mt Heine	basanite	4.68	0.06	2 σ	Ar-Ar	Cooper et al., 2007
OU74802	White Island, SE of Mt Heine	basanite	2.11	0.05	2 σ	Ar-Ar	Cooper et al., 2007
OU74853	White Island, west of Mt Nipha	basanite dyke	5.04	0.31	2 σ	Ar-Ar	Cooper et al., 2007
OU74791	White Island	basanite	3.29	0.1	2 σ	Ar-Ar	Cooper et al., 2007
OU74805	White Island, Camp Crater	zircon in anorthosite nodule	7.65	0.69	2 σ	U-Pb	Cooper et al., 2007
Mt Discovery
15170	Mt Discovery, summit	feldspar in basalt	5.3	0.14	1 σ	K-Ar	Armstrong, 1978
AW86950	Mt Discovery summit region	feldspar-phyric tephriphonolite	5.46	0.16	n.r.	K-Ar	Wright-Grassham, 1987
AW86970	Mt Discovery summit region	small phonolite dome	5.35	0.19	n.r.	K-Ar	Wright-Grassham, 1987
AW84720	Mt Discovery summit region	phonolite	5.34	0.11	n.r.	K-Ar	Wright-Grassham, 1987
AW86899	Mt Discovery summit region	benmoreite lava	5.27	0.1	n.r.	K-Ar	Wright-Grassham, 1987
AW84753	Mt Discovery summit region	aphyric hawaiite lava	5.19	0.32	n.r.	K-Ar	Wright-Grassham, 1987
AW86944	Mt Discovery summit region	basanite lava filling crater	4.45	0.26	n.r.	K-Ar	Wright-Grassham, 1987
AW86883	Mt Discovery, east low flank	phonolite dome	1.87	0.43	n.r.	K-Ar	Wright-Grassham, 1987
mc28	Mt Discovery	olivine basalt lava	0.06	0.006	2 σ	Ar-Ar	Tauxe et al., 2004	sample locations not specified
mc29	Mt Discovery	basalt dyke cutting youthful cone	0.18	0.08	2 σ	Ar-Ar	Tauxe et al., 2004	sample locations not specified
Helms Bluff
AW83614	Helms Bluff	basanite	4.51	0.31	n.r.	K-Ar	Wright-Grassham, 1987
Minna Hook
AW82097B	Minna Hook	feldspar in tephriphonolite	11	1.1	n.r.	K-Ar	Wright-Grassham, 1987
AW8413-PM	Minna Hook	trachyte	10.9	0.2	n.r.	K-Ar	Wright-Grassham, 1987
AW82097B	Minna Hook	lava lobe in hyaloclastite (tephriphonolite?)	9.73	0.46	n.r.	K-Ar	Wright-Grassham, 1987	minor but significant groundmass alteration
AW82046	Minna Hook	columnar jointed tephrite lava	10.04	0.2	n.r.	K-Ar	Wright-Grassham, 1987
AW82296	Minna Hook	lava pod in hyaloclastite	9.01	0.23	n.r.	K-Ar	Wright-Grassham, 1987
AW82072	Minna Hook	greenish tephriphonolite dyke	9.06	0.12	n.r.	K-Ar	Wright-Grassham, 1987
AW82078	Minna Hook	phonolite lava	8.34	0.1	n.r.	K-Ar	Wright-Grassham, 1987
AW82141	Minna Hook	tephriphonolite lava	8.25	0.18	n.r.	K-Ar	Wright-Grassham, 1987
AW82163	Minna Hook	tephrite lava	7.26	0.22	n.r.	K-Ar	Wright-Grassham, 1987
[multiple samples]	Minna Hook	wide range of compositions & multiple eruptive units	11.80-8.18	-	2 σ	Ar-Ar	Fargo, 2008	48 samples dated
MB-06-523	Minna Hook/Minna Bluff	hyaloclastite breccia	10.4	0.05	1 σ	Ar-Ar	Antibus et al., 2014
MB-06-529	Minna Hook/Minna Bluff	hyaloclastite breccia	9.53	0.1	1 σ	Ar-Ar	Antibus et al., 2014
MB-06-531	Minna Hook/Minna Bluff	autoclastic breccia	9.7	0.05	1 σ	Ar-Ar	Antibus et al., 2014
MB-06-554	Minna Hook/Minna Bluff	hyaloclastite breccia	11.44	0.05	1 σ	Ar-Ar	Antibus et al., 2014
MB-06-560	Minna Hook/Minna Bluff	hyaloclastite breccia	8.79	0.3	1 σ	Ar-Ar	Antibus et al., 2014
MB-06-593	Minna Hook/Minna Bluff	hyaloclastite breccia	9.11	0.18	1 σ	Ar-Ar	Antibus et al., 2014
MB-06-605	Minna Hook/Minna Bluff	hyaloclastite breccia	11.6	0.07	1 σ	Ar-Ar	Antibus et al., 2014
MB-06-626	Minna Hook/Minna Bluff	hyaloclastite breccia	9.92	0.23	1 σ	Ar-Ar	Antibus et al., 2014
MB-06-678	Minna Hook/Minna Bluff	hyaloclastite breccia	9.1	0.05	1 σ	Ar-Ar	Antibus et al., 2014
MB-07-069	Minna Hook/Minna Bluff	hyaloclastite breccia	5.74	0.15	1 σ	Ar-Ar	Antibus et al., 2014
MB-07-118	Minna Hook/Minna Bluff	pyroclastic lapilli tuff	10.01	0.32	1 σ	Ar-Ar	Antibus et al., 2014
MB-07-135	Minna Hook/Minna Bluff	autoclastic breccia	9.14	0.04	1 σ	Ar-Ar	Antibus et al., 2014
MB-07-148	Minna Hook/Minna Bluff	hyaloclastite breccia	5.84	0.88	1 σ	Ar-Ar	Antibus et al., 2014
MB-07-152	Minna Hook/Minna Bluff	hyaloclastite breccia	7.64	0.23	1 σ	Ar-Ar	Antibus et al., 2014
MB-07-156	Minna Hook/Minna Bluff	pyroclastic lapilli tuff	7.64	0.23	1 σ	Ar-Ar	Antibus et al., 2014
MB-07-172	Minna Hook/Minna Bluff	pyroclastic breccia	9.72	0.003	1 σ	Ar-Ar	Antibus et al., 2014
MB-07-230	Minna Hook/Minna Bluff	lapilli tuff	9.04	0.57	1 σ	Ar-Ar	Antibus et al., 2014
Dailey Islands
mc20	Juergens Island, Dailey Islands	dyke cutting youthful-looking cone	0.77	0.032	2 σ	Ar-Ar	Tauxe et al., 2004	outcrops may be stalled at an early evolutionary stage of a larger shield or stratovolcano
Mt Morning Volcanic Field
Mt Morning
MM 32	Mt Morning, probably Gandalf Ridge	trachyandesite dyke	15.4	0.5	1 σ	K-Ar	Armstrong, 1978
77M41	Mt Morning, Gandalf Ridge	mugearite	18.7	0.3	n.r.	K-Ar	Kyle and Muncy, 1989
77M45	Mt Morning, Gandalf Ridge	comendite trachyte	17.6	0.6	n.r.	K-Ar	Kyle and Muncy, 1989
77M04	Mt Morning, Gandalf Ridge	peralkaline trachyte	17.2	0.2	n.r.	K-Ar	Kyle and Muncy, 1989
77M62	Mt Morning, Gandalf Ridge	comendite trachyte	16.8	0.2	n.r.	K-Ar	Kyle and Muncy, 1989
25799	Mt Morning, Gandalf Ridge	trachyte	15.5	0.5	n.r.	K-Ar	Kyle and Muncy, 1989
OU 78508	Mt Morning, Riviera Ridge	sanidine in rhyolite	15.4	0.1	1 σ	Ar-Ar	Martin et al., 2010
77M81	Mt Morning, Riviera Ridge	quartz trachyte	15.2	0.2	1 σ	K-Ar	Kyle and Muncy, 1989
77M84	Mt Morning, Riviera Ridge	comendite trachyte	14.6	0.2	1 σ	K-Ar	Kyle and Muncy, 1989
AW86072	Mt Morning, Riviera Ridge	phonotephrite	14.1	0.3	n.r.	K-Ar	Wright-Grassham, 1987
AW86042	Mt Morning, Riviera Ridge	sanidine in basanite	13.1	0.3	n.r.	K-Ar	Wright-Grassham, 1987
AW86025	Mt Morning, Riviera Ridge	benmoreite	13	0.3	n.r.	K-Ar	Wright-Grassham, 1987
K-8v	Mt Morning	phonolite	2.2	n.r.	n.r.	K-Ar	Polyakov et al., 1976	sample location poorly known
K-8g	Mt Morning	phonolite	1.2	n.r.	n.r.	K-Ar	Polyakov et al., 1976	sample location poorly known
K-8p	Mt Morning	phonolite	1	n.r.	n.r.	K-Ar	Polyakov et al., 1976	sample location poorly known
K-9	Mt Morning	phonolite	1	n.r.	n.r.	K-Ar	Polyakov et al., 1976	sample location poorly known
K-10	Mt Morning	phonolite	2.4	n.r.	n.r.	K-Ar	Polyakov et al., 1976	sample location poorly known
MM106	Mt Morning	phonolite	1.15	0.02	1 σ	K-Ar	Armstrong, 1978
mc37	Mt Morning; deeply dissected cone, eastern part of field	olivine basalt lava	4.47	0.04	2 σ	Ar-Ar	Tauxe et al., 2004	sample locations not specified
mc41	Mt Morning	olivine basalt lava	0.28	0.02	2 σ	Ar-Ar	Tauxe et al., 2004	sample locations not specified
mc36	Mt Morning	olivine basalt lava	0.12	0.02	2 σ	Ar-Ar	Tauxe et al., 2004	sample locations not specified
mc39	Mt Morning	olivine basalt lava	0.084	0.008	2 σ	Ar-Ar	Tauxe et al., 2004	sample locations not specified
OU 78218	Mt Morning	sanidine in phonolite	5.01	0.04	1 σ	Ar-Ar	Martin et al., 2010
OU 78654	Mt Morning	hawaiite dyke	3.88	0.05	1 σ	K-Ar	Martin et al., 2010
OU 78602	Mt Morning	amphibole in tephrite	3.07	0.08	1 σ	Ar-Ar	Martin et al., 2010
OU 78600	Mt Morning	sanidine in phonolite	1.88	0.03	1 σ	Ar-Ar	Martin et al., 2010
OU 78556	Mt Morning	tephrite	1.85	0.03	1 σ	K-Ar	Martin et al., 2010
OU 78559	Mt Morning	basanite	1.23	0.03	1 σ	K-Ar	Martin et al., 2010
OU 78619	Mt Morning	sanidine in phonolite	1.19	0.03	1 σ	Ar-Ar	Martin et al., 2010
OU 78608	Mt Morning	nepheline in phonolite	1.12	0.05	1 σ	Ar-Ar	Martin et al., 2010
OU 78701	Mt Morning	basalt	1.06	0.02	1 σ	K-Ar	Martin et al., 2010
OU 78531	Mt Morning	basanite	0.66	0.03	1 σ	K-Ar	Martin et al., 2010
OU 78589	Mt Morning	picrobasalt	0.41	0.02	1 σ	K-Ar	Martin et al., 2010
OU 78566	Mt Morning	tephrite	0.29	0.02	1 σ	K-Ar	Martin et al., 2010
OU 77027	Mt Morning	basalt	0.15	0.01	1 σ	K-Ar	Martin et al., 2010
55288-01	Mt Morning (flank cone)	basalt	3.5	0.2	2 σ	Ar-Ar	Paulsen and Wilson, 2009
55290-01	Mt Morning (flank cone)	basalt	0.31	0.08	2 σ	Ar-Ar	Paulsen and Wilson, 2009
55298-01	Mt Morning (flank cone)	basalt	0.17	0.1	2 σ	Ar-Ar	Paulsen and Wilson, 2009
55308-01	Mt Morning (flank cone)	basalt	0.06	0.08	2 σ	Ar-Ar	Paulsen and Wilson, 2009
55302-01	Mt Morning (flank cone)	basalt	-0.02	0.02	2 σ	Ar-Ar	Paulsen and Wilson, 2009
55286-01	Mt Morning (flank cone)	basalt	-0.27	0.22	2 σ	Ar-Ar	Paulsen and Wilson, 2009
55300-01	Mt Morning (flank cone)	basalt	-0.29	0.36	2 σ	Ar-Ar	Paulsen and Wilson, 2009
55306-01	Mt Morning (flank cone)	basalt	0.41	0.39	2 σ	Ar-Ar	Paulsen and Wilson, 2009
Mason Spur
AW83569	Mason Spur	comendite trachyte	12.8	0.44	n.r.	Ar-Ar	Wright-Grassham, 1987
AW83712	Mason Spur	trachyte	12.52	0.57	n.r.	Ar-Ar	Wright-Grassham, 1987
AW83513	Mason Spur	sanidine in mugearite	12.1	0.2	n.r.	K-Ar	Wright-Grassham, 1987
AW85839	Mason Spur	benmoreite	11.7	0.4	n.r.	K-Ar	Wright-Grassham, 1987
AW83678	Mason Spur	comendite trachyte	11.46	0.1	n.r.	Ar-Ar	Wright-Grassham, 1987
AW83653	Mason Spur	trachyte	11.4	0.2	n.r.	K-Ar	Wright-Grassham, 1987
AW83653	Mason Spur	trachyte	11.4	0.09	n.r.	K-Ar	Wright-Grassham, 1987
AW83647	Mason Spur	phonolite	6.13	0.2	n.r.	K-Ar	Wright-Grassham, 1987
55158-01	Mason Spur (flank cone)	basalt	0.23	0.22	2 σ	Ar-Ar	Paulsen and Wilson, 2009
55151-01	Mason Spur (flank cone)	basalt	0.07	0.08	2 σ	Ar-Ar	Paulsen and Wilson, 2009
OU 78634	Mason Spur	sanidine in tephrite	12.9	0.1	1 σ	Ar-Ar	Martin et al., 2010
OU 78635	Mason Spur	comendite trachyte	12.6	0.2	1 σ	K-Ar	Martin et al., 2010
OU 78628	Mason Spur	sanidine in trachyte	11.4	0.1	1 σ	Ar-Ar	Martin et al., 2010
Southern Local Suite
Dry Valleys
LMJ-1	Moraine, west side of Meserve Glacier, Wright Valley, 1 m depth	basalt clast	3.4	0.6	1 σ	K-Ar	Fleck et al., 1972
LMJ-2	Moraine, west side of Meserve Glacier, Wright Valley, surface	basalt clast	3.4	0.1	1 σ	K-Ar	Fleck et al., 1972
LMJ-3	Volcanic cone, west margin of Meserve Glacier, Wright Valley	basalt	2.5	0.3	1 σ	K-Ar	Fleck et al., 1972
LMJ-4	Small volcanic cone upslope of LMJ-1; Wright Valley	basalt	4.2	0.2	1 σ	K-Ar	Fleck et al., 1972
WV3	Near Bartley Glacier, Wright Valley	Basalt cone	3.75	0.2	1 σ	K-Ar	Armstrong, 1978
WV 2E	Near Goodspeed Glacier, Wright Valley	Basalt cone	3.5	0.2	1 σ	K-Ar	Armstrong, 1978
1	Caps hill below Marr Glacier, Taylor Valley	Basalt lava	2.93	0.1	1 σ	K-Ar	Armstrong, 1978
3	Erosion remnant near 1	Basalt lava	2.89	0.1	1 σ	K-Ar	Armstrong, 1978
6	Outcrop plastered on steep wall below Marr Glacier, Taylor Valley	Basalt	2.87	0.15	1 σ	K-Ar	Armstrong, 1978
7	E of Solas Glacier, Taylor Valley	core of dyke or cinder cone plug intruding red scoria	4.64	0.12	1 σ	K-Ar	Armstrong, 1978
8	E of Solas Glacier, Taylor Valley	dyke with prominent radial jointing	4.5	0.7	1 σ	K-Ar	Armstrong, 1978
10	In front of Solas Glacier, Taylor Valley	Basalt lava	3	0.1	1 σ	K-Ar	Armstrong, 1978
10'	Solas Glacier, Taylor Valley	Same lava, different locality	2.66	0.06	1 σ	K-Ar	Armstrong, 1978
12	W of Solas Glacier, Taylor Valley	Basalt on valley wall	3.11	0.09	1 σ	K-Ar	Armstrong, 1978
13	W of Solas Glacier, Taylor Valley, 140 m above 12	Dyke on valley wall	2.95	0.07	1 σ	K-Ar	Armstrong, 1978
16	Next to Matterhorn Glacier, near highest exposure, covered by erratics; Taylor Valley	Basalt	3.33	0.1	1 σ	K-Ar	Armstrong, 1978
19	Near Matterhorn Glacier, lower elevn than 16; may overlie till & is covered by erratics; Taylor Valley	Basalt	3.38	0.14	1 σ	K-Ar	Armstrong, 1978
20	E of Rhone Glacier, Taylor Valley	Bomb on scoria cone near summit	2	0.18	1 σ	K-Ar	Armstrong, 1978
23	E of Rhone Glacier, Taylor Valley	Bomb on flank of scoria cone	1.79	0.13	1 σ	K-Ar	Armstrong, 1978
24	Above Taylor Glacier, Taylor Valley	Lava capping till, covered by erratics	1.94	0.12	1 σ	K-Ar	Armstrong, 1978
26	Ridge crest above Taylor Glacier,Taylor Valley	lava cascade	1.84	0.11	1 σ	K-Ar	Armstrong, 1978
27	Above Taylor Glacier, Taylor Valley	Welded spatter from partly dissected scoria cone	1.53	0.06	1 σ	K-Ar	Armstrong, 1978
29	Ridge crest above Taylor Glacier,Taylor Valley; 300 m above 26	lava cascade	2	0.06	1 σ	K-Ar	Armstrong, 1978
TWV87019	East Rhone site, Taylor Valley	intact cone with lavas	1.5	0.05	2 σ	Ar-Ar	Wilch et al., 1993***
86K-20	East Rhone site, Taylor Valley	intact cone with lavas	2.71	0.24	2 σ	Ar-Ar	Wilch et al., 1993***
86K-06	West Matterhorn site, Taylor Valley	eroded pyroclastic deposits and lava	2.97	0.14	2 σ	Ar-Ar	Wilch et al., 1993***
TWV87048	West Matterhorn site, Taylor Valley	eroded pyroclastic deposits and lava	2.98	0.14	2 σ	Ar-Ar	Wilch et al., 1993***
TWV87047	West Matterhorn site, Taylor Valley	eroded pyroclastic deposits and lava	3.05	0.08	2 σ	Ar-Ar	Wilch et al., 1993***
TWV87037	West Matterhorn site, Taylor Valley	eroded pyroclastic deposits and lava	3.26	0.08	2 σ	Ar-Ar	Wilch et al., 1993***
TWV87037	West Matterhorn site, Taylor Valley	eroded pyroclastic deposits and lava	3.15	0.16	2 σ	Ar-Ar	Wilch et al., 1993***
86K-021	West Matterhorn site, Taylor Valley	eroded pyroclastic deposits and lava	3.47	0.05	2 σ	Ar-Ar	Wilch et al., 1993***
TWV87042	West Matterhorn site, Taylor Valley	eroded pyroclastic deposits and lava	3.49	0.07	2 σ	Ar-Ar	Wilch et al., 1993***
TWV87032	West Matterhorn site, Taylor Valley	eroded pyroclastic deposits and lava	3.56	0.09	2 σ	Ar-Ar	Wilch et al., 1993***
TWV87016A	East Matterhorn site, Taylor Valley	eroded pyroclastic deposits and lava	3.74	0.25	2 σ	Ar-Ar	Wilch et al., 1993***
TWV87070	East La Croix site, Taylor Valley	eroded welded pyroclastic deposits	2.57	0.09	2 σ	Ar-Ar	Wilch et al., 1993***
TWV88015	East Borns site, Taylor Valley	multiple vent sites, incl. partially eroded cone	1.62	0.15	2 σ	Ar-Ar	Wilch et al., 1993***
TWV87071	East Borns site, Taylor Valley	eroded pyroclastic deposits and lava; multiple vent sites, incl. partially eroded cone	1.7	0.06	2 σ	Ar-Ar	Wilch et al., 1993***
TWV88014	East Borns site, Taylor Valley	eroded pyroclastic deposits and lava; multiple vent sites, incl. partially eroded cone	1.79	0.06	2 σ	Ar-Ar	Wilch et al., 1993***
TWV87027	East Borns site, Taylor Valley	eroded pyroclastic deposits and lava; multiple vent sites, incl. partially eroded cone	1.84	0.06	2 σ	Ar-Ar	Wilch et al., 1993***
TWV88017	East Borns site, Taylor Valley	eroded pyroclastic deposits and lava; multiple vent sites, incl. partially eroded cone	2.53	0.13	2 σ	Ar-Ar	Wilch et al., 1993***
TWV88021	East Borns site, Taylor Valley	eroded pyroclastic deposits and lava; multiple vent sites, incl. partially eroded cone	2.61	0.04	2 σ	Ar-Ar	Wilch et al., 1993***
TWV87066	Sollas site (west), Taylor Valley; immediately adjacent to Sollas Glacier	feeder dykes and sills with spatter-fed lava	2.51	0.04	2 σ	Ar-Ar	Wilch et al., 1993***
TWV87014	Sollas site (north), Taylor Valley	eroded lava	1.89	0.13	2 σ	Ar-Ar	Wilch et al., 1993***
TWV87012N	Sollas site (north &east), Taylor Valley	eroded pyroclastic deposits and lava	2.19	0.04	2 σ	Ar-Ar	Wilch et al., 1993***
TWV87007	Sollas site (north &east), Taylor Valley	eroded pyroclastic deposits and lava	2.2	0.18	2 σ	Ar-Ar	Wilch et al., 1993***
TWV87008	Sollas site (north &east), Taylor Valley	eroded pyroclastic deposits and lava	2.23	0.07	2 σ	Ar-Ar	Wilch et al., 1993***
TWV87010	Sollas site (north &east), Taylor Valley	vent pond lava	3.57	0.14	2 σ	Ar-Ar	Wilch et al., 1993***
TWV87009	Sollas site (north &east), Taylor Valley	columnar feeder dyke	3.89	0.06	2 σ	Ar-Ar	Wilch et al., 1993***
TWV87004	Marr site, Taylor Valley	multiple vent sites with pyroclastic deposits & lava	2.54	0.17	2 σ	Ar-Ar	Wilch et al., 1993***
TWV87102F	Marr site, Taylor Valley	multiple vent sites with pyroclastic deposits & lava	2.56	0.13	2 σ	Ar-Ar	Wilch et al., 1993***
Royal Society Range foothills
30	N summit of The Bulwark	Bomb	1.66	0.4	1 σ	K-Ar	Armstrong, 1978
31a	Floor of Pyramid Trough	Basalt dome, covered with erratics but not very eroded	0.22	0.12	1 σ	K-Ar	Armstrong, 1978
31b	As 31a	Same basalt dome	0.22	0.06	1 σ	K-Ar	Armstrong, 1978
32	Floor of Pyramid Trough	Nearby dome, also preglacial	0.08	0.13	1 σ	K-Ar	Armstrong, 1978
33	Bottom of Pyramid Trough	Lava on scoria cone, moderately glaciated	0.71	0.16	1 σ	K-Ar	Armstrong, 1978
35	Tongue flowing off The Bulwark into Pyramid Trough	Lava; has palagonite tuff exterior; till mantled surface; inverted topography	1.83	0.09	1 σ	K-Ar	Armstrong, 1978
36	On the side of The Bulwark	Massive lava exposed by erosion	2.88	0.15	1 σ	K-Ar	Armstrong, 1978
37	Near tongue of Koettlitz Glacier	Massive lava or megapillow associated with pillow-agglomerate complex	13.2	0.4	1 σ	K-Ar	Armstrong, 1978	age possibly unreliable
40	On top of The Bulwark	Lava; appears to overlie till	1.65	0.3	1 σ	K-Ar	Armstrong, 1978
43	Canyon in front of Walcott Glacier	Upper lava unit; age anomalously old	5.7	0.5	1 σ	K-Ar	Armstrong, 1978	age possibly unreliable
44	Canyon in front of Walcott Glacier	Upper lava unit	0.45	0.07	1 σ	K-Ar	Armstrong, 1978
45	Canyon in front of Walcott Glacier	Upper lava unit	0.27	0.1	1 σ	K-Ar	Armstrong, 1978
46	Canyon in front of Walcott Glacier	Lower lava	1.45	0.15	1 σ	K-Ar	Armstrong, 1978
47a	Roaring Valley	Basalt dome	1.12	0.14	1 σ	K-Ar	Armstrong, 1978
47b	Roaring Valley	Basalt dome	1.35	0.2	1 σ	K-Ar	Armstrong, 1978
48a	Roaring Valley	2nd basalt dome	1.25	0.1	1 σ	K-Ar	Armstrong, 1978
49a	Roaring Valley	Lava cascading down valley side, base covered by moraine	2.1	0.09	1 σ	K-Ar	Armstrong, 1978
49b	Roaring Valley	Lava cascading down valley side, base covered by moraine	1.78	0.19	1 σ	K-Ar	Armstrong, 1978
50a	Roaring Valley, near mouth of valley	Lava flooding valley	0.9	0.09	1 σ	K-Ar	Armstrong, 1978
50b	Roaring Valley, near mouth of valley	Lava flooding valley	0.84	0.07	1 σ	K-Ar	Armstrong, 1978
53	Dromedary Platform, Royal Society Range	Lava on platform	2.44	0.16	1 σ	K-Ar	Armstrong, 1978
65	Dromedary Platform, Royal Society Range	Lava on platform	1.68	0.08	1 σ	K-Ar	Armstrong, 1978
66	Dromedary Platform, Royal Society Range	Lava on platform	1.68	0.08	1 σ	K-Ar	Armstrong, 1978
73	Near Howchin Glacier	Lava	13.8	0.2	1 σ	K-Ar	Armstrong, 1978	age possibly unreliable
mc47 or mc49	Near terminus of Walcott Glacier	olivine basalt	1.14	0.02	2 σ	Ar-Ar	Tauxe et al., 2004
mc50	Roaring Valley	olivine basalt	1.9	0.1	2 σ	Ar-Ar	Tauxe et al., 2004
mc100	Royal Society Range foothills	n.r.	0.86	0.23	2 σ	Ar-Ar	Lawrence et al., 2009
mc104	Royal Society Range foothills	n.r.	0.29	0.02	2 σ	Ar-Ar	Lawrence et al., 2009
mc106	Royal Society Range foothills	n.r.	13.42	0.18	2 σ	Ar-Ar	Lawrence et al., 2009
mc108	Royal Society Range foothills	n.r.	0.41	0.14	2 σ	Ar-Ar	Lawrence et al., 2009
mc111	Royal Society Range foothills	n.r.	1.99	0.04	2 σ	Ar-Ar	Lawrence et al., 2009
mc115	Royal Society Range foothills	n.r.	2.46	0.31	2 σ	Ar-Ar	Lawrence et al., 2009
mc118	Royal Society Range foothills	n.r.	0.31	0.04	2 σ	Ar-Ar	Lawrence et al., 2009
mc122	Royal Society Range foothills	n.r.	12.7	0.09	2 σ	Ar-Ar	Lawrence et al., 2009
mc123	Royal Society Range foothills	n.r.	1.93	0.05	2 σ	Ar-Ar	Lawrence et al., 2009
mc124	Royal Society Range foothills	n.r.	12.61	0.11	2 σ	Ar-Ar	Lawrence et al., 2009
mc139	Royal Society Range foothills	n.r.	0.88	0.08	2 σ	Ar-Ar	Lawrence et al., 2009
mc140	Royal Society Range foothills	n.r.	2.03	0.09	2 σ	Ar-Ar	Lawrence et al., 2009
mc143	Royal Society Range foothills	n.r.	2.08	0.65	2 σ	Ar-Ar	Lawrence et al., 2009
Terror Rift Volcanic Field
Franklin Island
R2C	Franklin Island	Olivine basalt	4.8	2	1 σ	K-Ar	Armstrong, 1978
ANT1-6	Franklin Island, SW corner	dyke intruding hyaloclastite	3.3	0.04	2 σ	Ar-Ar	Rilling et al., 2007, 2009
ANT1-9	Franklin Island, SW corner	mid-level lava sampled	3.4	0.04	2 σ	Ar-Ar	Rilling et al., 2007, 2009
ANT5A-19	Franklin Island, west side	lowest lava sampled	3.7	0.16	2 σ	Ar-Ar	Rilling et al., 2007, 2009
Beaufort Island
BFT1	Beaufort Island, near the summit, c. 670 m asl	n.r.	6.8	0.05	2 σ	Ar-Ar	Rilling et al., 2009
BFT2	Beaufort Island, near the summit, c. 670 m asl	n.r.	6.77	0.03	2 σ	Ar-Ar	Rilling et al., 2009
Seamounts
04DRE1-31	18 km S of Franklin Island, on same volcanic ridge; 'site 2' in Fig. 25	dredged lava	0.134	0.024	2 σ	Ar-Ar	Rilling et al., 2007, 2009
04DRE1-32	18 km S of Franklin Island, on same volcanic ridge; 'site 2' in Fig. 25	dredged lava	0.123	0.026	2 σ	Ar-Ar	Rilling et al., 2007, 2009
04DRE2-42	50 km NE of Franklin Island; 'site 3' in Fig. 2	dredged lava	1	0.05	2 σ	Ar-Ar	Rilling et al., 2009
04DRE3-59	10 km NNW of Franklin Island; 'site 4' in Fig. 25	dredged lava	0.188	0.176	2 σ	Ar-Ar	Rilling et al., 2009
04DRE3-73	10 km NNW of Franklin Island; 'site 4' in Fig. 25	dredged lava	0.09	0.066	2 σ	Ar-Ar	Rilling et al., 2007, 2009
04DRE4-75	10 km ESE of Beaufort Island; 'site 6' in Fig. 25	dredged lava	1.94	0.04	2 σ	Ar-Ar	Rilling et al., 2009
04DRE4-76	10 km ESE of Beaufort Island; 'site 6' in Fig. 25	dredged lava	1.94	0.04	2 σ	Ar-Ar	Rilling et al., 2009
04DRE5-80	50 km N of Beaufort Island; 'site 7' in Fig. 25	dredged lava	3.96	0.08	2 σ	Ar-Ar	Rilling et al., 2009
04DRE5-85	50 km N of Beaufort Island; 'site 7' in Fig. 25	dredged lava	3.75	0.14	2 σ	Ar-Ar	Rilling et al., 2009
04DRE6-107	6 km NNE of Franklin Island	dredged lava	0.509	0.024	2 σ	Ar-Ar	Rilling et al., 2009
04DRE7-120	7 km NE of Franklin Island	dredged lava	0.556	0.038	2 σ	Ar-Ar	Rilling et al., 2009
TRDR02	20 km NE of Franklin Island	dredged basalt	0.33	0.03	n.r.	K-Ar	Lee et al., 2015
TRDR02	21 km NE of Franklin Island	dredged basalt	0.29	0.03	n.r.	K-Ar	Lee et al., 2015
TRDR03	22 km NE of Franklin Island	dredged basalt	0.57	0.05	n.r.	K-Ar	Lee et al., 2015
TRDR03	23 km NE of Franklin Island	dredged basalt	0.46	0.04	n.r.	K-Ar	Lee et al., 2015
TRDR04	120 km W of Franklin Island	dredged basalt	0.46	0.03	n.r.	K-Ar	Lee et al., 2015
TRDR04	121 km W of Franklin Island	dredged basalt	0.41	0.03	n.r.	K-Ar	Lee et al., 2015
n.r. - not recorded
s.d. - error standard deviation
* Lithology names taken from original publication; do not necessarily comply with modern TAS-based names
** Ages in Ma unless otherwise stated; ages as published, not recalculated using more recently published decay constants
*** Total gas, plateau and isotope correlation ages given by Wilch et al. (1993) but isotope correlation ages quoted here, following authors' preference; many of the dated sites were also dated by Armstrong (1978)
